# Supplementary material for: Is Reversible Cognitive Frailty a Unified Syndrome? Insights from a Bifactor Exploratory Structural Equation Model in People with HIV
Source: Research Square preprint supplement (doi:10.21203/rs.3.rs-8516156/v1), 2026-01-16
Supplement: Supplementary file 1 [file 6bb4d7ae9463a9a0920e6249.docx]

**SUPPLEMENTARY MATERIAL**

**S1 Specific Modifications to the Frailty Criteria**

| **Modified Fried’s Frailty Criteria (Fried et al., 2001)** | **Modifications from the Positive Brain Health Now dataset** | **Responses** |
| --- | --- | --- |
| Self-reported exhaustion | “How much of the time during the past 4 weeks did you feel worn out?” | "None of the Time"; "A little of the time"; "Some of the time"; "A Good Bit of the Time"; "Most of the time"; "All of the time" |
| Low physical activity (< 150 m/week) | What best describes your physical activity level in the past 6 months? | "Vigorously active for at least 30 minutes, 3 times per week"; "Moderately active at least 3 times per week"; "Seldom active, preferring sedentary activities" |
| Weakness (measured by grip strength) | “Does your health now limit you in lifting and carrying groceries?” | "No, not limited at all"; "Yes, limited a little"; "Yes, limited a lot" |
| Slowness (measured by the gait speed test “ | “Does your health now limit you in walking several blocks?” | "No, not limited at all"; "Yes, limited a little"; "Yes, limited a lot" |
| Unintentional weight loss ([(> 4.5 kg or 10lbs in past year]) | Body mass index (BMI) | "Normal", "Underweight", "Overweight", "Obese" |

**S2 Standardized Factor Loadings from the Two-Factor CFA Model**

| **Domain** | **Indicator** | **β** | **SE** | **p-value** | **R²** |
| --- | --- | --- | --- | --- | --- |
| Cognitive Difficulty |  |  |  |  |  |
|  | Attention | 0.903 | 0 | - | 0.815 |
|  | Retrospective Memory | 0.888 | 0.024 | 0 | 0.789 |
|  | Prospective Memory | 0.859 | 0.026 | 0 | 0.737 |
|  | Planning | 0.859 | 0.025 | 0 | 0.737 |
| Physical Frailty |  |  |  |  |  |
|  | Exhaustion | 0.671 | 0 | - | 0.45 |
|  | Gait Speed | 0.430 | 0.064 | 0 | 0.24 |
|  | Grip Strength | 0.492 | 0.083 | 0 | 0.26 |
|  | Physical activity | 0.511 | 0.08 | 0 | 0.18 |

*Note*. β = standardized factor loading; SE = standard error; R² = proportion of variance explained. Reference indicators (first per factor) have SE and p-value fixed for identification.


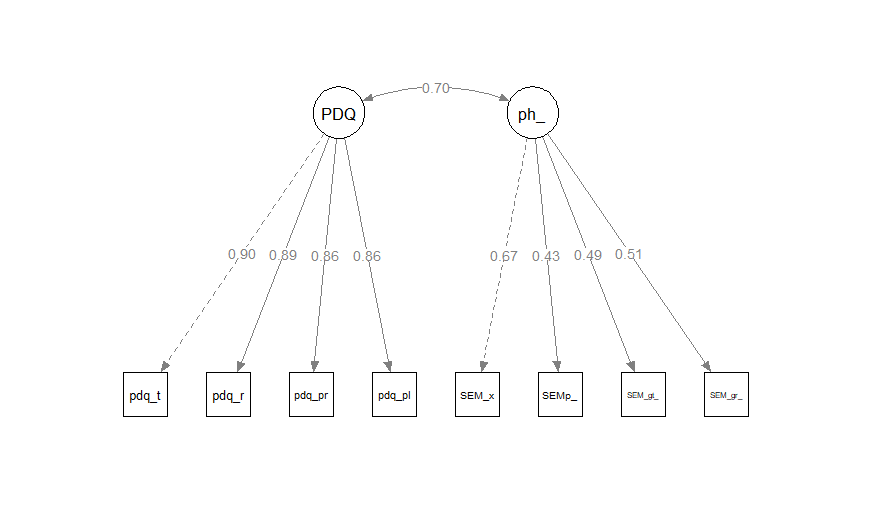

**Figure S2: Two-factor CFA of cognitive difficulty (PDQ) and physical frailty: standardized loadings and factor correlation**

**Abbreviation**: PDQ = Perceived Deficits Questionnaire (cognitive difficulty latent factor); ph_ = physical frailty latent factor; pdq_t = PDQ Attention; pdq_r = PDQ Retrospective Memory; pdq_pr = PDQ Prospective Memory; pdq_pl = PDQ Planning or Organization; SEM_x = self-reported Exhaustion; SEMp_ = Physical Activity; SEM_gt = gait speed limitation; SEM_gr = grip strength limitation.

**S3 Standardized Factor Loadings from the Two-Factor ESEM Model**

| **Indicator** | **Cognitive factor** | **Physical factor** | **R²** |
| --- | --- | --- | --- |
| PDQ Attention | **0.9***** |  | 0.81 | |
| PDQ Retrospective memory | **0.881***** |  | 0.777 | |
| PDQ Prospective memory | **0.851***** |  | 0.724 | |
| PDQ Planning/organization | **0.855***** |  | 0.731 | |
| Exhaustion | **0.455***** | 0.131 | 0.271 | |
| Physical activity |  | **0.401***** | 0.16 | |
| Gait speed |  | **0.72***** | 0.518 | |
| Grip strength |  | **0.695***** | 0.483 | |

**Note** : PDQ = Perceived Deficit Questionnaire ; R² = proportion of variance explained; *** p < .001.


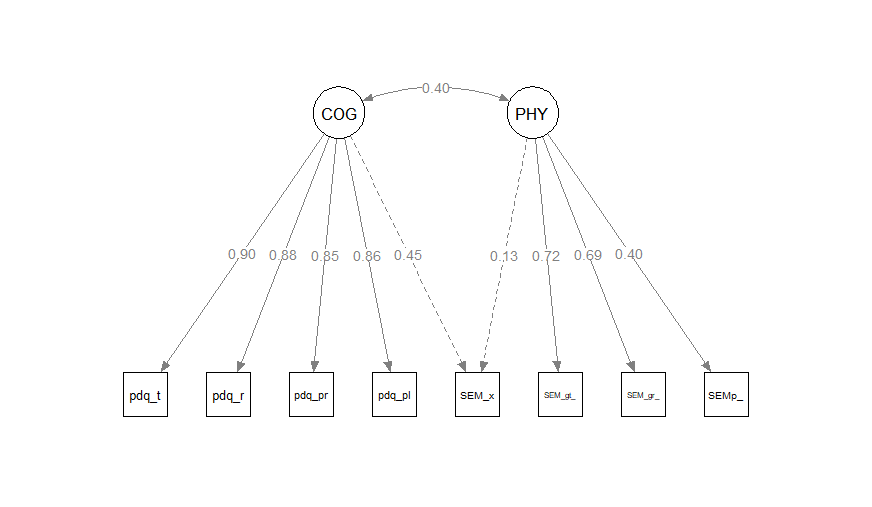


**Figure S3: Two-Factor ESEM of cognitive difficulty (PDQ) and physical frailty: standardized loadings and factor correlation.**

**Abbreviation**:COG = Cognitive difficulty latent factor; PHY = physical frailty latent factor; pdq_t = PDQ Attention; pdq_r = PDQ Retrospective Memory; pdq_pr = PDQ Prospective Memory; pdq_pl = PDQ Planning or Organization; SEM_x = self-reported Exhaustion; SEMp_ = Physical Activity; SEM_gt = gait speed limitation; SEM_gr = grip strength limitation.

**S4 Standardized Factor Loadings from the Bifactor-CFA Model**

| **Indicator** | **General (G)** | **Cognitive factor (COG)** | **Physical factor (PHYS)** | **R²** |
| --- | --- | --- | --- | --- |
| PDQ Attention | **0.864** | 0.233 |  | 0.800 |
| PDQ Retrospective memory | **0.770** | **0.598** |  | 0.950 |
| PDQ Prospective memory | **0.787** | 0.312 |  | 0.717 |
| PDQ Planning/organization | **0.904** | 0.064# |  | 0.822 |
| Exhaustion | **0.614** |  | 0.133 | 0.395 |
| Physical activity | 0.283 |  | 0.296 | 0.167 |
| Gait speed | 0.238 |  | **0.773** | 0.653 |
| Grip strength | 0.276 |  | **0.583** | 0.417 |

*Note*. G = general reversible cognitive frailty factor; target specific factor loadings shown in bold. All loadings p < .01 except #Planning on Cognitive-Specific factor (p = 0.29).


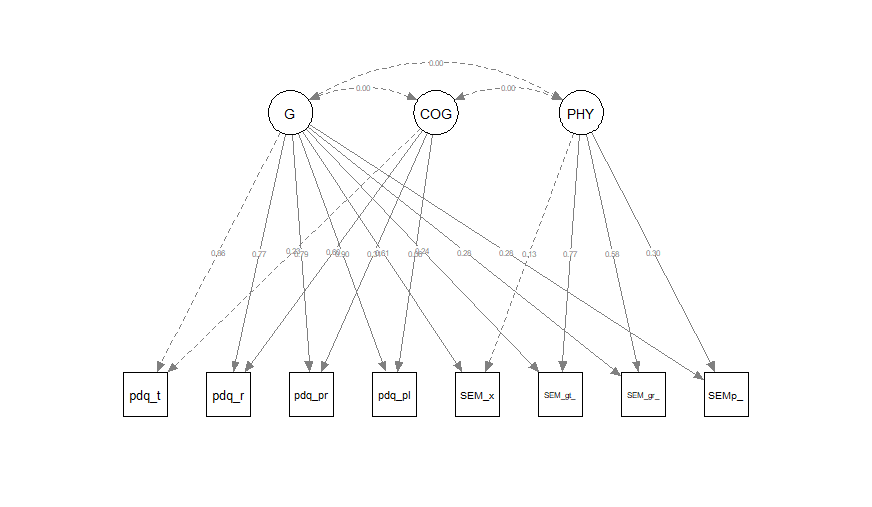


**Figure S4: Bifactor-CFA of general cognitive frailty, cognitive difficulty (PDQ), physical frailty: standardized loadings and factor correlation.**

**Abbreviation**:COG = Cognitive difficulty latent factor; PHY = physical frailty latent factor; G = General cognitive frailty factor; pdq_t = PDQ Attention; pdq_r = PDQ Retrospective Memory; pdq_pr = PDQ Prospective Memory; pdq_pl = PDQ Planning or Organization; SEM_x = self-reported Exhaustion; SEMp_ = Physical Activity; SEM_gt = gait speed limitation; SEM_gr = grip strength limitation.

**S5 Regression Models Predicting Adjusted Health-Related Quality of Life from Bifactor-ESEM Factors**

| **Outcome** | **Model** | **R²** | **Adj. R²** | **F statistic** |
| --- | --- | --- | --- | --- |
| Mental Health (MCS_adjusted) |  |  |  |  |
|  | General Only | 0.512 | 0.51 | F(3, 820) = 286.31 |
|  | Specific Only | 0.122 | 0.118 | F(4, 819) = 28.57 |
|  | Combined | 0.53 | 0.527 | F(5, 818) = 184.58 |
| Physical Health (PCS_adjusted) |  |  |  |  |
|  | General Only | 0.388 | 0.386 | F(3, 820) = 173.26 |
|  | Specific Only | 0.179 | 0.175 | F(4, 819) = 44.50 |
|  | Combined | 0.478 | 0.474 | F(5, 818) = 149.52 |

*Note*. Adjusted composites exclude overlapping RAND-36 subscales (see Methods). All models control for age and sex.

**S6 Combined Model Unstandardized Regression Coefficients Predicting Adjusted Health-Related Quality of Life Composites**

| **Outcome** | **Predictor** | **b** | **SE** | **p** |
| --- | --- | --- | --- | --- |
| Mental Health (MCS_adjusted) |  |  |  |  |
|  | (Intercept) | 36.399 | 1.947 | < .001 |
|  | General_Factor | −9.583 | 0.342 | < .001 |
|  | Cognitive_Specific | −1.833 | 0.333 | < .001 |
|  | Physical_Specific | 0.796 | 0.363 | 0.028 |
|  | Age | 0.148 | 0.036 | < .001 |
|  | Sex (Male) | −1.075 | 0.81 | 0.185 |
| Physical Health (PCS_adjusted) |  |  |  |  |
|  | (Intercept) | 48.006 | 1.5 | < .001 |
|  | General_Factor | −6.937 | 0.263 | < .001 |
|  | Cognitive_Specific | −0.771 | 0.256 | 0.003 |
|  | Physical_Specific | −5.822 | 0.279 | < .001 |
|  | Age | −0.063 | 0.028 | 0.021 |
|  | Sex (Male) | 0.035 | 0.624 | 0.956 |

*Note*. b = unstandardized regression coefficient; SE = standard error

**S7 PLS-SEM Path Coefficients for Hierarchical and Additive Models**

| **Model** | **Path** | **β** | **SE** | **95% CI** |
| --- | --- | --- | --- | --- |
| Hierarchical Model | CogDys → CogF | 0.72 | 0.01 | [0.70, 0.74] |
|  | PhysF → CogF | 0.39 | 0.01 | [0.37, 0.41] |
|  | CogF → HRQoL | −0.75 | 0.02 | [−0.78, −0.72] |
| Additive Model |  |  |  |  |
|  | CogDys → HRQoL | −0.36 | 0.03 | [−0.40, −0.31] |
|  | PhysF → HRQoL | −0.51 | 0.02 | [−0.55, −0.46] |

*Note*. CogDys = self-reported cognitive difficulty (reflective); PhysF = physical frailty (formative); CogF = higher-order reversible cognitive frailty construct; HRQoL = health-related quality of life (adjusted composites). β = standardized path coefficient; SE = bootstrap standard error (5,000 resamples); CI = confidence interval.

**S8 Variance Explained in Health-Related Quality of Life: PLS-SEM Models**

| **Model** | **R² for HRQoL** |
| --- | --- |
| Hierarchical (CogF → HRQoL) | 0.561 |
| Additive (CogDys + PhysF → HRQoL) | 0.389 |

*Note*. HRQoL defined by adjusted mental and physical health composites. CogDys = self-reported cognitive difficulty (reflective); PhysF = physical frailty (formative); CogF = higher-order reversible cognitive frailty construct; HRQoL = health-related quality of life (adjusted composites).
